# Supplementary material for: Self-reported physical and mental health of Australian carers: a cross-sectional study
Source: PubMed Central journal article supplement — BMJ Open. 2016 Sep 13;6(9):e011417. doi: 10.1136/bmjopen-2016-011417 (PMC5030584; doi:10.1136/bmjopen-2016-011417), 2016-09-13

### Supplementary Figure 1 Comparison between depressive symptoms reported by rural carers compared to data from Australian National Survey

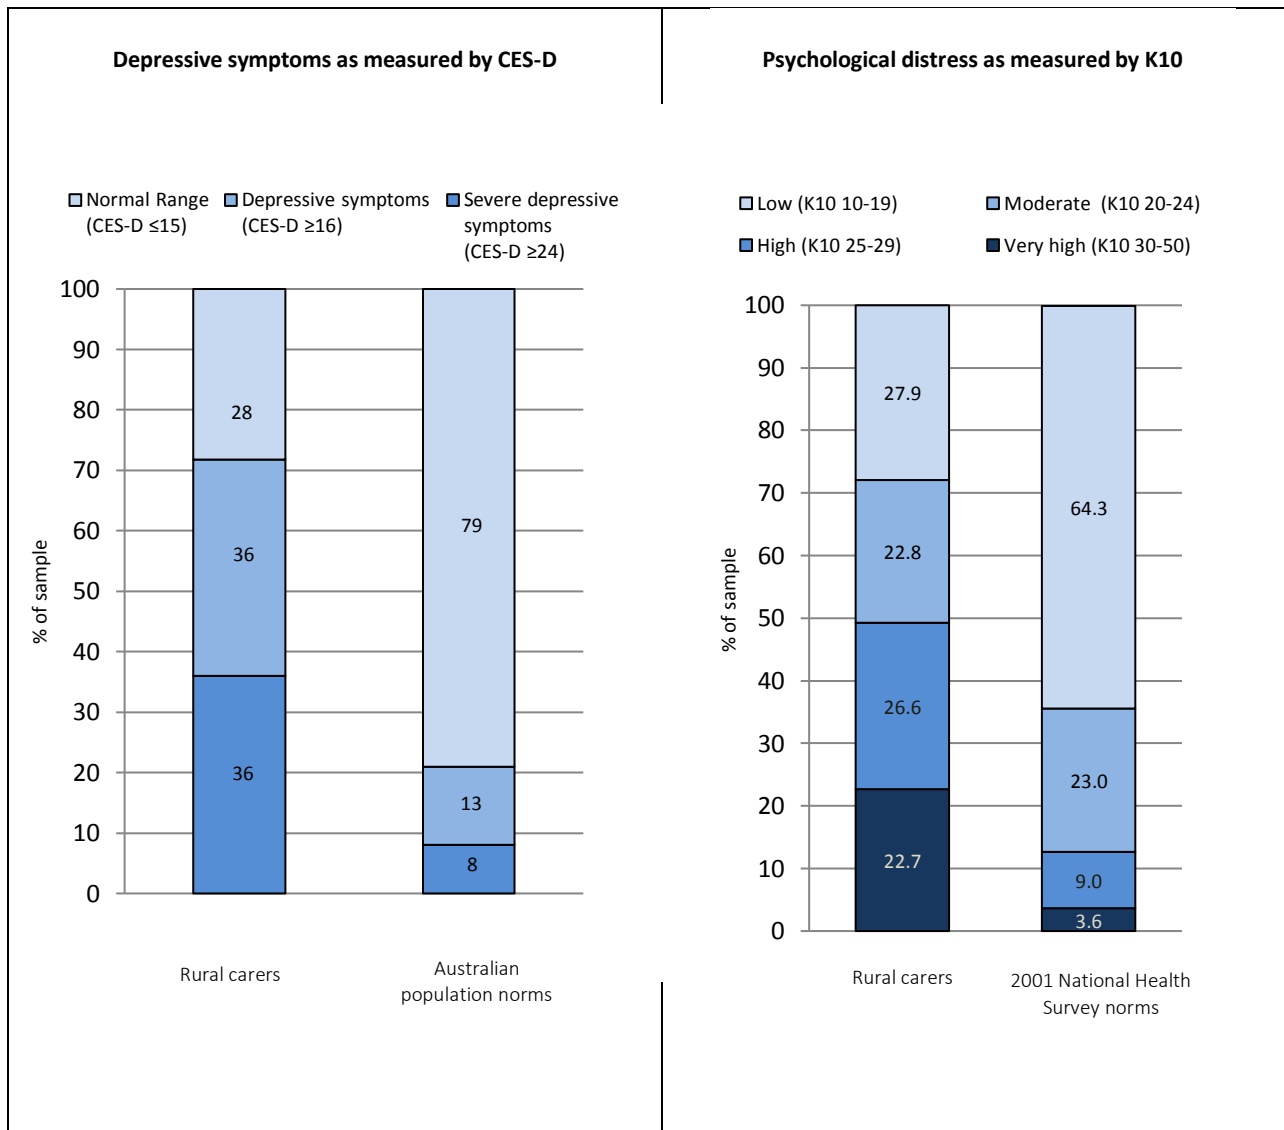

Supplement: bmjopen-2016-011417supp_figure.pdf [file bmjopen-2016-011417supp_figure.pdf]
